# Supplementary material
Source: publisher site journal article supplement (https://en-cdn.bio-protocol.org/attached/file/20191230/3491%20Appendix.docx)
Supplement: Supplementary file 1 [file 3491%20Appendix.docx]

**[Appendix]** Micrograph preprocessing script, mgprep.pl

*#!/usr/bin/perl -w*

*# Preparing a set of micrograph frames for SPA*

*# Bernard Heymann*

*# 20160309 - 20190916*

*#*

*# usage: mgprep.pl in1.mrc [in2.mrc ...]*

*#*

*# The output will have file names that are derived from the input base names.*

**use** strict;

*# These parameters should be adapted for each specific case*

**my** $bin = 2; *# Optional binning, set to 1 for no binning*

**my** $px = 0.858; *# Pixel size before binning*

**my** $dose = 1.0; *# Dose per fram in electrons/Å2*

**my** $volt = 300; *# Acceleration voltage in kV*

**my** $cs = 2.7; *# Spherical aberration in mm*

**my** $amp = 0.07; *# Amplitude fraction*

**my** $refnum = 8; *# Initial frame to choose as alignment reference*

**my** $tile = "512,512,1"; *# Tile size for power spectrum calculation*

**my** $resaln = "20,1000"; *# Limits for frame alignment*

**my** $resctf = "5,20"; *# Limits for CTF fitting*

**my** $defrange = "0.5,3.5"; *# Defocus range for CTF fitting*

**my** $tilt = 0; *# Specimen tilt angle (set zero for no tilt)*

**my** $axis = 0; *# Specimen tilt axis angle (ccw from x axis)*

**my** $expos = 20; *# Total exposure time to calculate the drift rate*

*# Gain reference image, leave it empty if the micrographs are already gain-corrected*

*#my $gr = "../mg/gain_20160902.dm4";*

**my** $gr = "";

**if** ( $gr ) { $gr = "-Gainreference " . $gr; }

**my** $pxb = $px * $bin; *# Pixel size after binning*

**foreach** **my** $f (@ARGV) {

**print** "$f\n";

**my** $b = $f;

$b =~ s{\.[^.]+$}{};

**my** $cmd;

**my** $pf;

**my** $pfs = $b . "_sum.star"; *# Frame alignment output parameter file*

**my** $pfc = $b . "_ctf.star"; *# CTF fit output parameter file*

**if** ( ! -f $f ) {

**print** "Error: File not found! ($f)\n";

**exit**;

} **elsif** ( $f =~ /star/ ) {

$pf = $f;

} **elsif** ( $f =~ /[pif|tif|mrc|dm4]/ ) {

$pf = $b . ".star";

$cmd = "bmg -verb 7 -extract frame -Pixel $pxb -Volt $volt -Amp $amp -Cs $cs -out $pf $fb2";

run($cmd) **if** ! -f $pf;

} **else** {

**print** "Error: No useful filename specified! ($f)\n";

**exit**;

}

$cmd = "bseries -verb 1 -frames -dose $dose -align $refnum -resol $resaln -shift 10 -bin $bin -exposure $expos -write sum -out $pfs $pf";

run($cmd) **if** ! -f $pfs;

$cmd = "bctf -verb 1 -action prepfit -fitastig 1 -Range $defrange -basetype 4 -envtype 4 -tile $tile -sam $pxb -resol $resctf -tilt $tilt -axis $axis -Volt $volt -Amp $amp -Cs $cs -out $pfc $pfs";

run($cmd) **if** ! -f $pfc;

}

**sub** run {

**my** $cmd = **shift** @_;

**print** "\n$cmd\n";

**open** **my** $fh, "$cmd|" **or** **die** $!;

**while** ( <$fh> ) {

**print**;

}

**close** $fh;

}
